# Supplementary material
Source: PubMed Central journal article supplement (PMC4976034)
Supplement: NIHMS796844-supplement-1.pdf [file NIHMS796844-supplement-1.pdf]

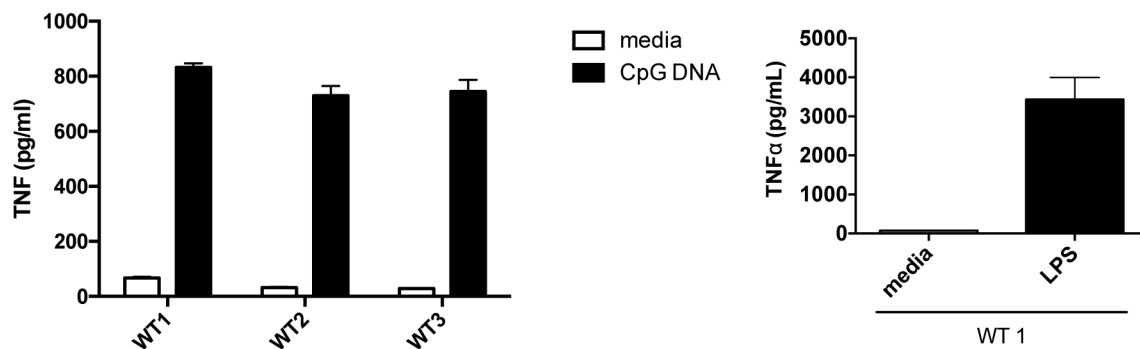

Supplementary Figure 1. Bone marrow-derived macrophages from three individual C57BL/6 mice were plated at  $2 \times 10^5$  cells per well in 24 well plates and stimulated in quadruplicate with  $1 \mu\text{M}$  CpG DNA, or for mouse 1 with 100ng/ml LPS, for 6 hours. Supernatants were assayed for TNF by ELISA.

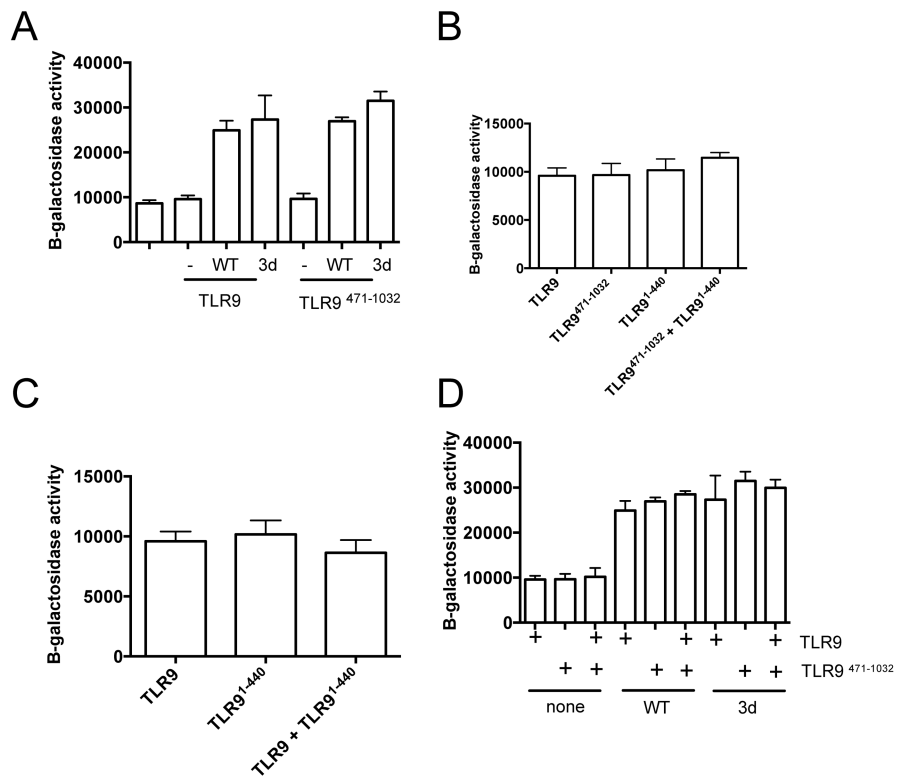

Supplementary Figure 2. Beta galactosidase controls for figures. A) Control for Figure 4B. B) Control for Figure 5C. C) Control for Figure 6B. D) Control for Figure 7B.
